# Supplementary material for: DExD/H Box Helicases DDX24 and DDX49 Inhibit Reactivation of Kaposi’s Sarcoma Associated Herpesvirus by Interacting with Viral mRNAs
Source: MDPI journal article supplement (doi:10.3390/v14102083), 2022-09-20
Supplement: s1 [file s1]

**Table S1.** The 22 DExD/H box helicase targets of the knockdown screen.

| Target DExD/H box gene |
|------------------------|
| EIF4A1                 |
| EIF4A2                 |
| DDX3X                  |
| DDX5                   |
| DDX11                  |
| DDX18                  |
| DDX21                  |
| DDX24                  |
| DHX29                  |
| DDX31                  |
| DHX36                  |
| DHX37                  |
| DHX40                  |
| DDX41                  |
| EIF4A3                 |
| DDX49                  |
| DDX52                  |
| DDX55                  |
| DHX58                  |
| DHX9                   |
| DDX58 (RIG-I)          |
| MDA5 (RLR)             |

[siRNA pools used were a gracious gift from the McFadden lab. siRNA screen of 22 DExD/H box helicases in Vero cells infected with rKSHV.219. All transient KD Vero cells looked healthy 28 hours after siRNA transfection and prior to chemical induction, with negligible spontaneous background reactivation.]

**Table S2.** Pooled siRNAs used in the Vero knockdown screen (ON-TARGETplus Dharmacon)

| Dharmacon siRNA pools used in Vero Screen |                           |
|-------------------------------------------|---------------------------|
| Target                                    | Sequence                  |
| DDX24                                     | 5'-GCAAGAAGAACGUCGGAGA-3' |
| L-010397-01-0005*                         | 5'-AGACAAAGAAGCCGAAGGA-3' |
|                                           | 5'-CCGUUUAGCUCGACAGAUU-3' |
|                                           | 5'-GAACCGUCGUCCUGAGAUU-3' |
| DHX29                                     | 5'-CUGCAGAUCAUUACGGAAU-3' |
| L-013759-01-0005*                         | 5'-GAGUGAUCAAUGAGCAUAA-3' |
|                                           | 5'-CGAAGAAUCUCAGCAGUUA-3' |
|                                           | 5'-AAAUGUAGGGUUAGGGUAA-3' |
| DDX49                                     | 5'-CGGCCCACUUUGACGAAAA-3' |
| L-017975-01-0005*                         | 5'-AGGUCAACGUGGUGCGAAG-3' |
|                                           | 5'-GUAUAAAGAAGAUCCGCUU-3' |
|                                           | 5'-CUGAGAAGGUCAAGGACGC-3' |
| Non-targeting Pool                        | 5'-UGGUUUACAUGUCGACUAA-3' |
| D-001810-10-05*                           | 5'-UGGUUUACAUGUUGUGUA-3'  |
|                                           | 5'-UGGUUUACAUGUUUUCUGA-3' |
|                                           | 5'-UGGUUUACAUGUUUCCUA-3'  |

\*Dharmacon catalog number

**Table S3.** Sequences of PCR primers.

| Target        | Sequence <sup>a</sup>              |
|---------------|------------------------------------|
| Human GAPDH   | F: 5'-CTTTGGTATCGTGGAAGGACTC-3'    |
| Human GAPDH   | R: 5'-GTAGAGGCAGGGATGATGTTC-3'     |
| RTA           | F: 5'-CACAAAAATGGCGCAAGATGA-3'     |
| RTA           | R: 5'-TGGTAGAGTTGGGCCTTCAGTT-3'    |
| LANA          | F: 5'-GCGCCCTTAACGAGAGGAAGTT-3'    |
| LANA          | R: 5'-TTCCTTCGCGGTTGTAGATG-3'      |
| K8.1          | F: 5'-CCACCACAGAACTGACCGAT-3'      |
| K8.1          | R: 5'-GTGGTGGCAGAAAATGGCAC-3'      |
| ORF59         | F: 5'-TTAGAAGTGGAAGGTGTGCC-3'      |
| ORF59         | R: 5'-TCCTGGAGTCCGGTATAGAATC-3'    |
| pCMV-DDK      | F: 5'-AGAAGAGGATCTGGCAGCAAA-3'     |
| pCMV-DDK      | R: 5'-GGCCGGCCGTTTAAACCTTAT-3'     |
| DDX24         | F: 5'-GGCCAGGTTTACAGGAATTA-3'      |
| DDX24         | R: 5'-GGGTGTATTGGGAGTCATT-3'       |
| DHX29         | F: 5'-TCTCGAGCTTGTGAATCTAC-3'      |
| DHX29         | R: 5'-CTGACTGGACACTTCTTTCA-3'      |
| DDX49         | F: 5'-TTGTCCTTCCCATCTTGCAG-3'      |
| DDX49         | R: 5'-CGACGATGATGCAGTCTTTC-3'      |
| DDX58         | F: 5'-ACCTACATCCTGAGCTACAT-3'      |
| DDX58         | R: 5'-TCATCCCCTTAGTAGAGCAA-3'      |
| Avi           | R: 5'-TGCCATTCAATTTTCTGCGCT-3'     |
| DHX29 ORF     | F: 5'-GCAGCTGAGAGTTCTCATTGAT-3'    |
| DDX24 ORF     | F: 5'-GCCCCAAGTAAGAGCGAGTC-3'      |
| DDX49 ORF     | F: 5'-CGCTTCAAGGAGAAGGTGGAG-3'     |
| IFN- $\alpha$ | F: 5'-ATGGCTAGGCTCTGTGCTTTCCT-3'   |
| IFN- $\alpha$ | R: 5'-AGGGCTCTC CAGACTTCTGCTCTG-3' |
| IFN- $\beta$  | F: 5'-CCCTATGGAGATGACGGAGA-3'      |
| IFN- $\beta$  | R: 5'-TCCCACGTCAATCTT TCCTC-3'     |

<sup>a</sup>F, forward; R, reverse

**Table S4.** Pool of RNAi (TRC) shRNAs used to generate DHX29 KD BCBL-1 stably transduced cells.

| GE Dharmacon Clone ID | Mature Antisense Sequence | Targets                                    |
|-----------------------|---------------------------|--------------------------------------------|
| TRCN0000051238        | AATAGTGGCTTGTATTTGAGG     | all human transcript variants of DHX29 ORF |
| TRCN0000051239        | ATGACAGCTATCTTTACAGGG     | ORF of NM_001345964.1                      |
| TRCN0000051240        | ATTGTAGGGCATACTACCAGG     | all human transcript variants of DHX29 ORF |
| TRCN0000051241        | TAATTCCTCCAAAGGTACACG     | all human transcript variants of DHX29 ORF |
| TRCN0000051242        | TAGAAGTTTCTGATACTTAGG     | all human transcript variants of DHX29 ORF |

[This pool of shRNAs was packaged individually into lentivirus and used to transduce BCBL-1 cells at a total pooled Multiplicity of Infection (MOI) of 10.]

Table S5. pcDNA3.2 clones of KSHV genes

| No. | KSHV gene | Clone ID      |
|-----|-----------|---------------|
| 1   | K2        | 11060-X09-780 |
| 2   | ORF70     | 11060-X12-780 |
| 3   | K4        | 11060-X13-780 |
| 4   | K4.1      | 11060-X14-780 |
| 5   | K4.2      | 11060-X15-780 |
| 6   | K5        | 11060-X16-780 |
| 7   | K9        | 11060-X62-780 |
| 8   | ORF58     | 11060-X66-780 |
| 9   | ORF59     | 11060-X67-780 |
| 10  | ORF65     | 11060-X73-780 |
| 11  | ORF66     | 11060-X74-780 |
| 12  | ORF67     | 11060-X75-780 |
